# Supplementary material
Source: PubMed Central journal article supplement (PMC4171079)
Supplement: supp_mcu170_mcu170supp.pdf [file supp_mcu170_mcu170supp.pdf]

## SUPPLEMENTARY DATA

Table 1S. Effect of an anion channel blocker (A-9-C) on the content of indolic compounds (ng/g FW) in maize coleoptile segments incubated in the presence of 10  $\mu$ M IAA. Coleoptile segments were first preincubated (over 1 h) in a control medium, whereupon A-9-C was added. At 2 h, IAA was added to the incubation medium (the same protocol was applied in growth experiments).

| Treatments                        | Content of indolic compounds in coleoptile segments (ng/g FW) |                               |
|-----------------------------------|---------------------------------------------------------------|-------------------------------|
|                                   | 60 min after addition of IAA                                  | 480 min after addition of IAA |
| KCl (10 mM)                       | 58.21 $\pm$ 2.12                                              | 57.95 $\pm$ 2.06              |
| IAA (10 $\mu$ M)                  | 66.83 $\pm$ 4.12                                              | 61.72 $\pm$ 4.12              |
| A-9-C (0.1 mM) + IAA (10 $\mu$ M) | 60.53 $\pm$ 3.38                                              | 59.18 $\pm$ 1.95              |

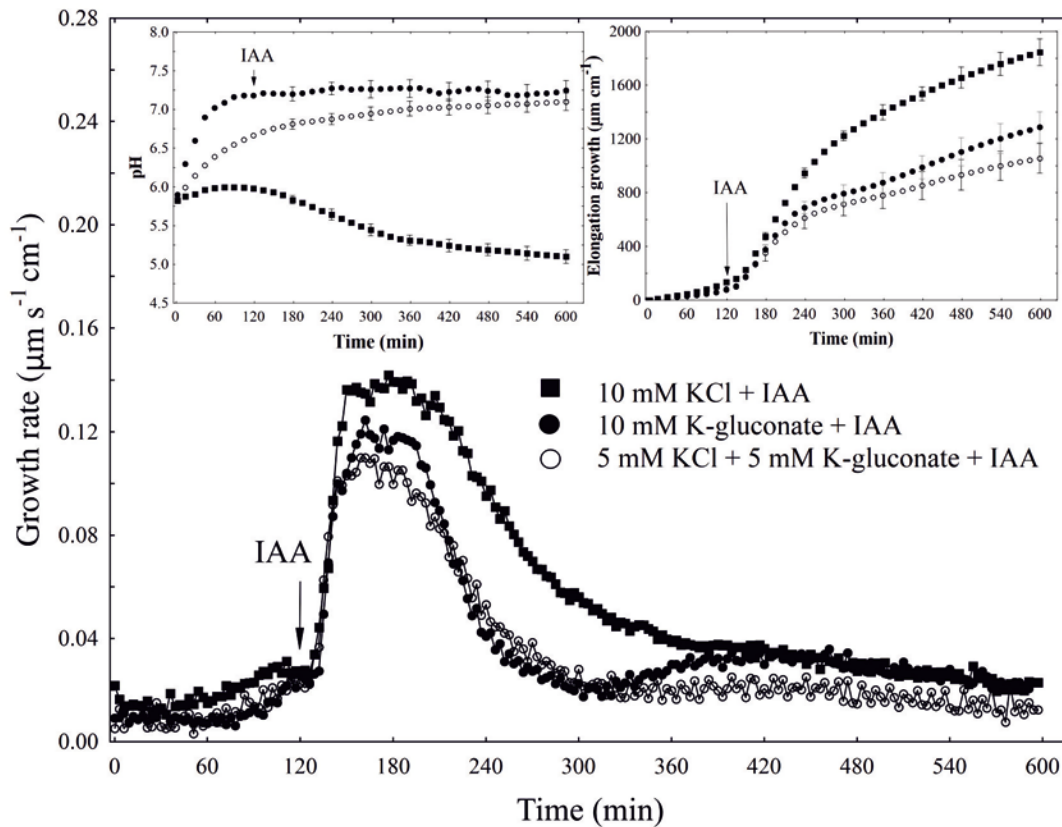

Figure 1S. Effect of KCl (10 mM) or K-gluconate (10 mM) or 5 mM of each KCl and K-gluconate on the growth and simultaneously measured medium pH of maize coleoptile segments incubated in the presence of 10  $\mu$ M IAA. The growth rate of a stack of 20 segments was measured as described in “Materials and Methods” (the second measuring system). Inset on the right shows the total elongation growth, calculated as the sum of extensions measured at 3-min intervals for over 10 h. Inset on the left presents medium pH changes of maize coleoptile segments incubated in the presence of IAA. All curves are means of at least 9 independent experiments.

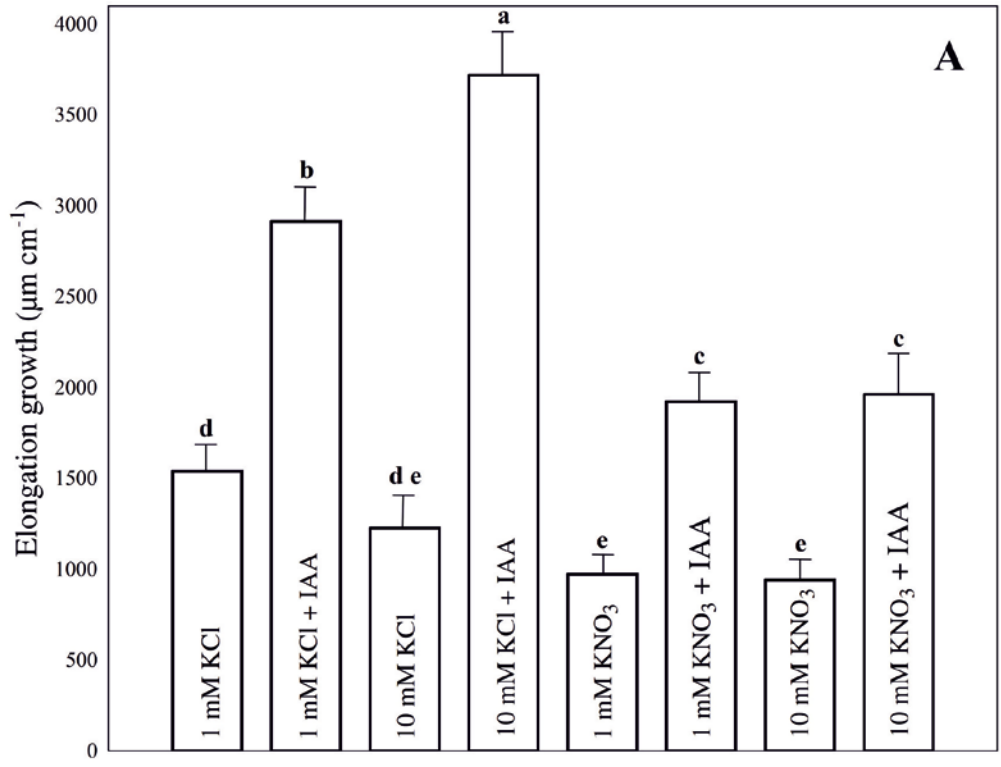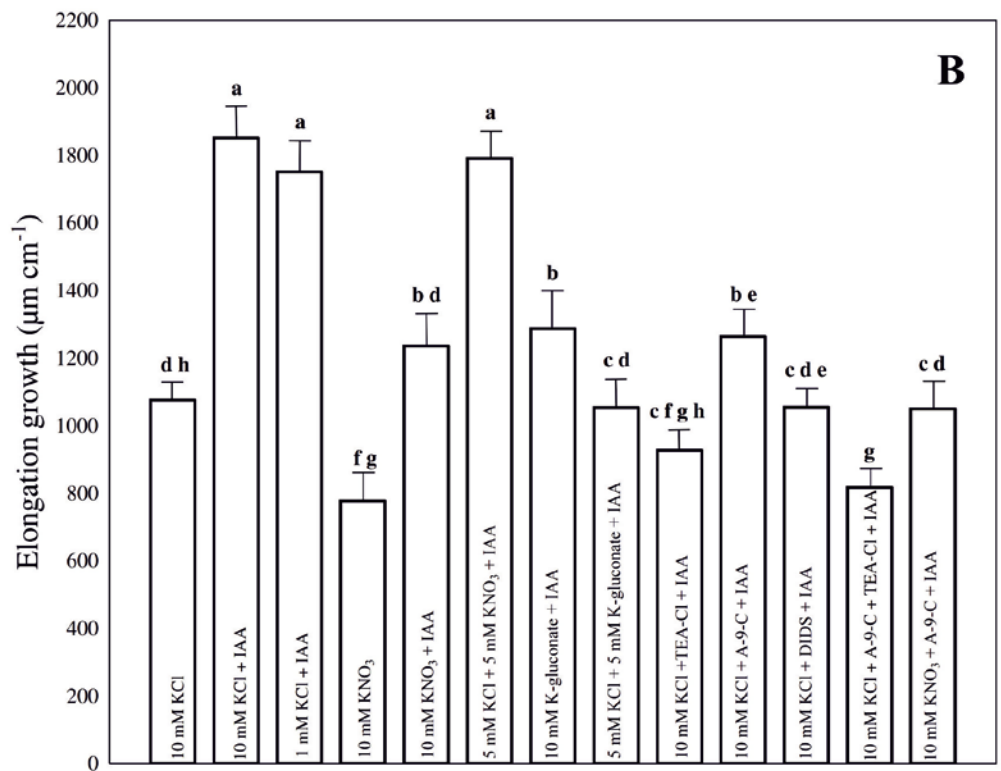

Figure 2S. Cumulative growth of maize coleoptile segments measured in the first (A) and the second system (B), as described in “Materials and Methods”. Bars indicate means of at least 7 independent experiments  $\pm$  SE. Means followed by the same letter are not significantly different from each other (LSD test  $P < 0.05$ ).
